# Supplementary material for: Mcidas mutant mice reveal a two-step process for the specification and differentiation of multiciliated cells in mammals
Source: Oxford University Press journal article supplement (doi:10.1242/dev.172643), 2019-03-15
Supplement: dev172643supp.pdf [file dev172643supp.pdf]

SUPPLEMENTAL INFORMATION

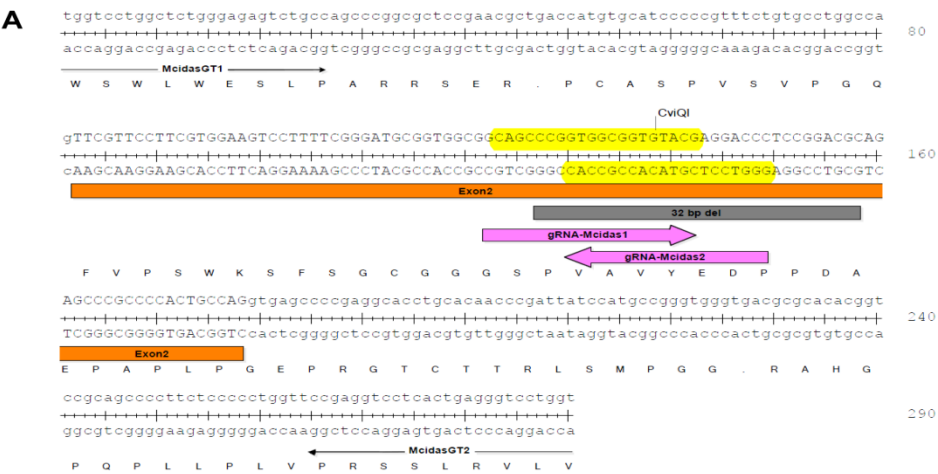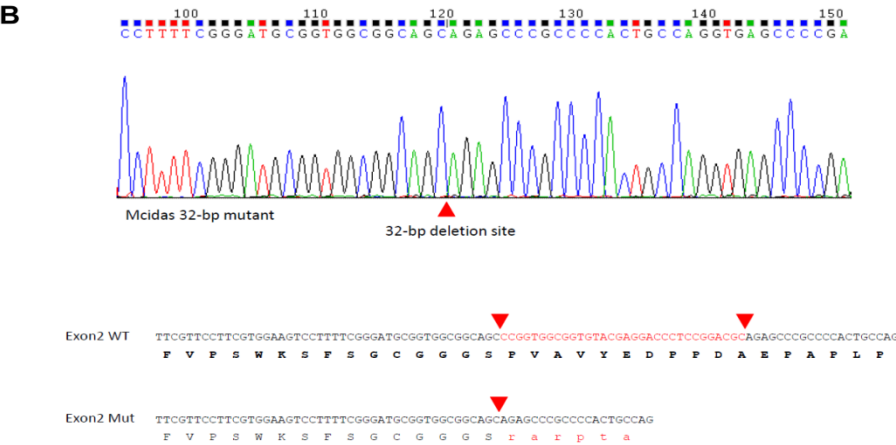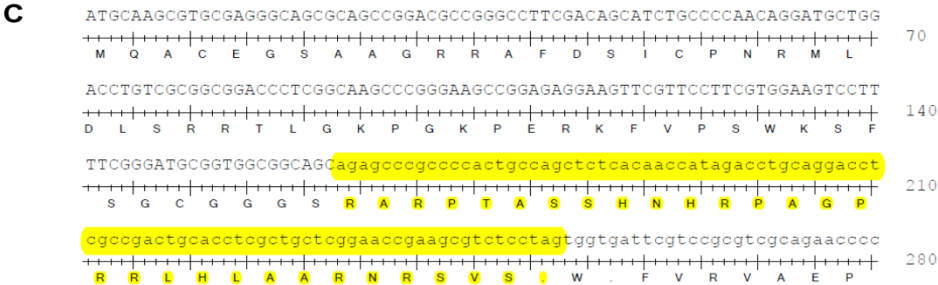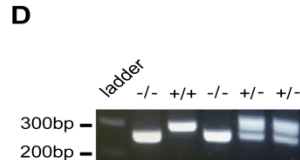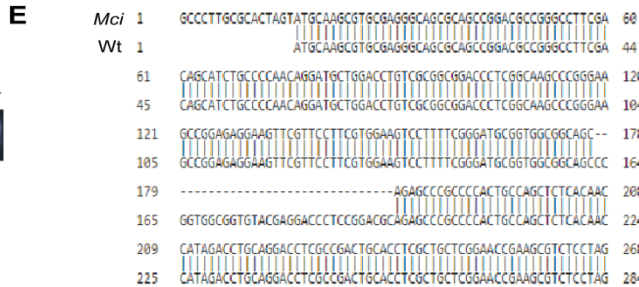

**Fig. S1. Generation of a deletion allele at the mouse *Mci* locus.** (A) Partial genomic sequence of the mouse *Mci* gene, showing the gRNAs (pink arrows) and their target sites on the forward and reverse strands (highlighted in yellow) used to induce a 32 bp deletion within exon 2. Binding sites for genotyping primers (McidasGT1 and McidasGT2) are also indicated. (B) Electropherogram showing 32 bp deletion in *Mci* exon 2. Also shown below is the conceptual translation of the wild-type and mutant *Mci* coding sequence around the deletion site. (C) Conceptual translation of the predicted mutant *Mci* ORF shows a highly truncated MCI protein, retaining only 54 native amino acids at the N-terminus. Sequences highlighted in yellow indicate disruption of the reading frame before the premature STOP codon. (D) Gel image of DNA fragments amplified in wild-type, heterozygote and homozygous *Mci* mutants using primers flanking the 32 bp deletion. Size of the wild-type band is 290 bp and the mutant band is 258 bp. (E) Sequence analysis of *Mci* cDNA obtained from tracheal tissue of the homozygous mutants confirms a deletion of 32 bp.

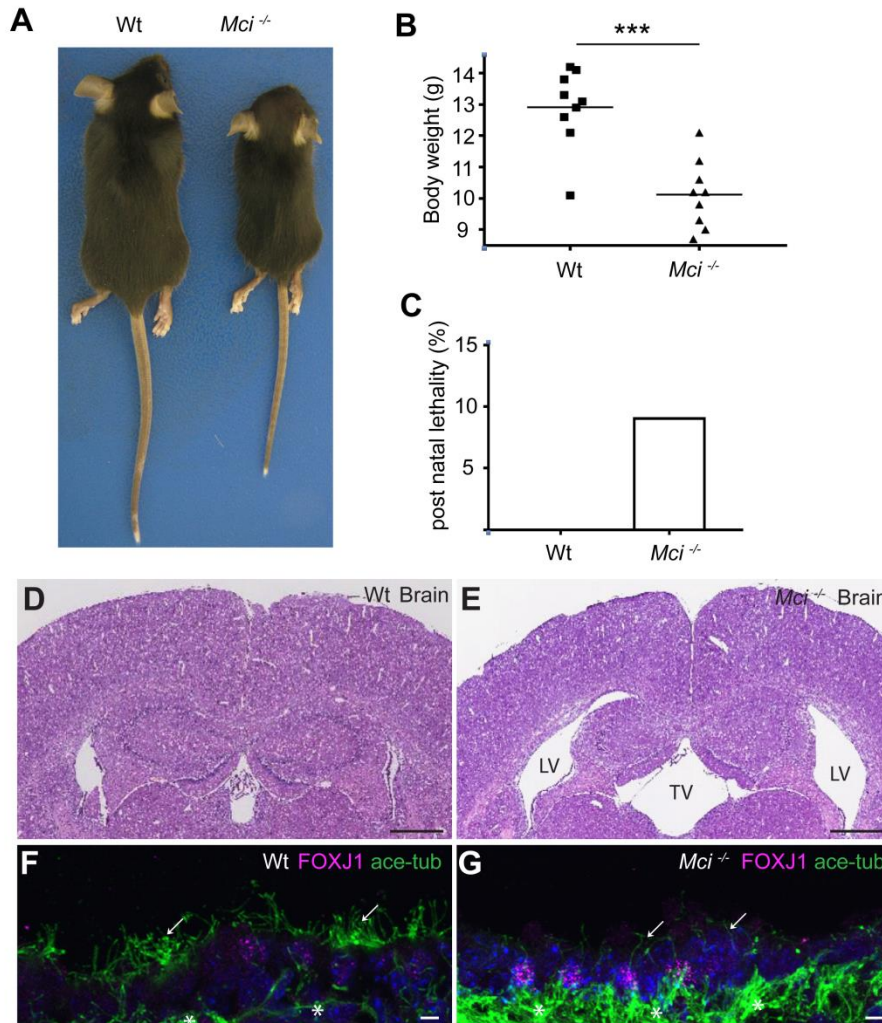

**Fig. S2. Gross phenotypes of *Mci* knockout mice.** (A) *Mci* knockout mice are smaller in size compared to the wild-type. (B) The body weight comparison between wild-type and *Mci* mutant mice at post-natal day (P) 28.  $n = 9$  for each genotype. (C) Percentage of lethality of wild type and *Mci* knockout mice at P28.  $n = 22$  for each genotype. (D) Wild-type mouse brain coronal section stained with H&E. (E) *Mci* mutant mouse brain coronal section stained with H&E. Note hydrocephalus with dilation of the lateral

ventricles (LV) and the third ventricle (TV). Scale bar = 1mm. (F) Nuclear localized FOXJ1 expression in MCCs of wild-type brain ependyma. Multicilia are indicated by arrows and the cytoskeletal microtubule network by asterisks. (G) Nuclear localized FOXJ1 expression in monociliated cells of *Mci* mutant brain ependyma. Monocilia are indicated by arrows and the cytoskeletal microtubule network by asterisks. Scale bars, 5  $\mu$ m.

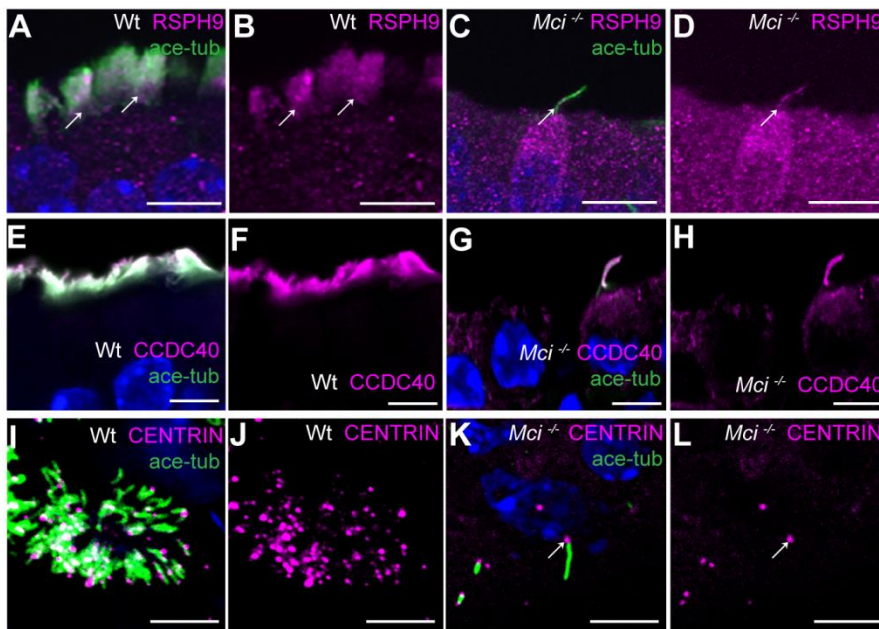

**Fig. S3. *Mci* mutant MCCs precursors differentiate a single cilium that localizes motile cilia-specific proteins but are unable to make multiple basal bodies.** (A) RSPH9 co-localization with acetylated tubulin to MCC cilia of wild-type trachea (arrows). (B) RSPH9 localization to MCC cilia of wild-type trachea (arrows; display of only RSPH9 staining from panel A). (C) RSPH9 co-localization with acetylated tubulin

to single cilium of *Mci* mutant trachea (arrow). (D) RSPH9 localization to single cilium of *Mci* mutant trachea (arrow; display of only RSPH9 staining from panel C). (E) CCDC40 co-localization with acetylated tubulin to MCC cilia of wild-type trachea (arrows). (F) CCDC40 localization to MCC cilia of wild-type trachea (arrows; display of only CCDC40 staining from panel A). (G) CCDC40 co-localization with acetylated tubulin to single cilium of *Mci* mutant trachea (arrow). (H) CCDC40 localization to single cilium of *Mci* mutant trachea (arrow; display of only CCDC40 staining from panel C). (I) Wild-type MCC differentiated in ALI culture with multiple basal bodies (stained with anti-CENTRIN antibodies) and multiple cilia. (J) Display of only CENTRIN staining from panel E. (K) *Mci* mutant cells differentiated in ALI culture with single basal body (expressing CENTRIN, arrow) and single cilium. (L) Display of only CENTRIN staining from panel G showing single basal body (arrow). In all preparations, cilia were stained with anti-acetylated tubulin antibodies (green) and nuclei with DAPI (blue). Scale bars A-D = 10  $\mu\text{m}$ ; E-L = 5  $\mu\text{m}$ .

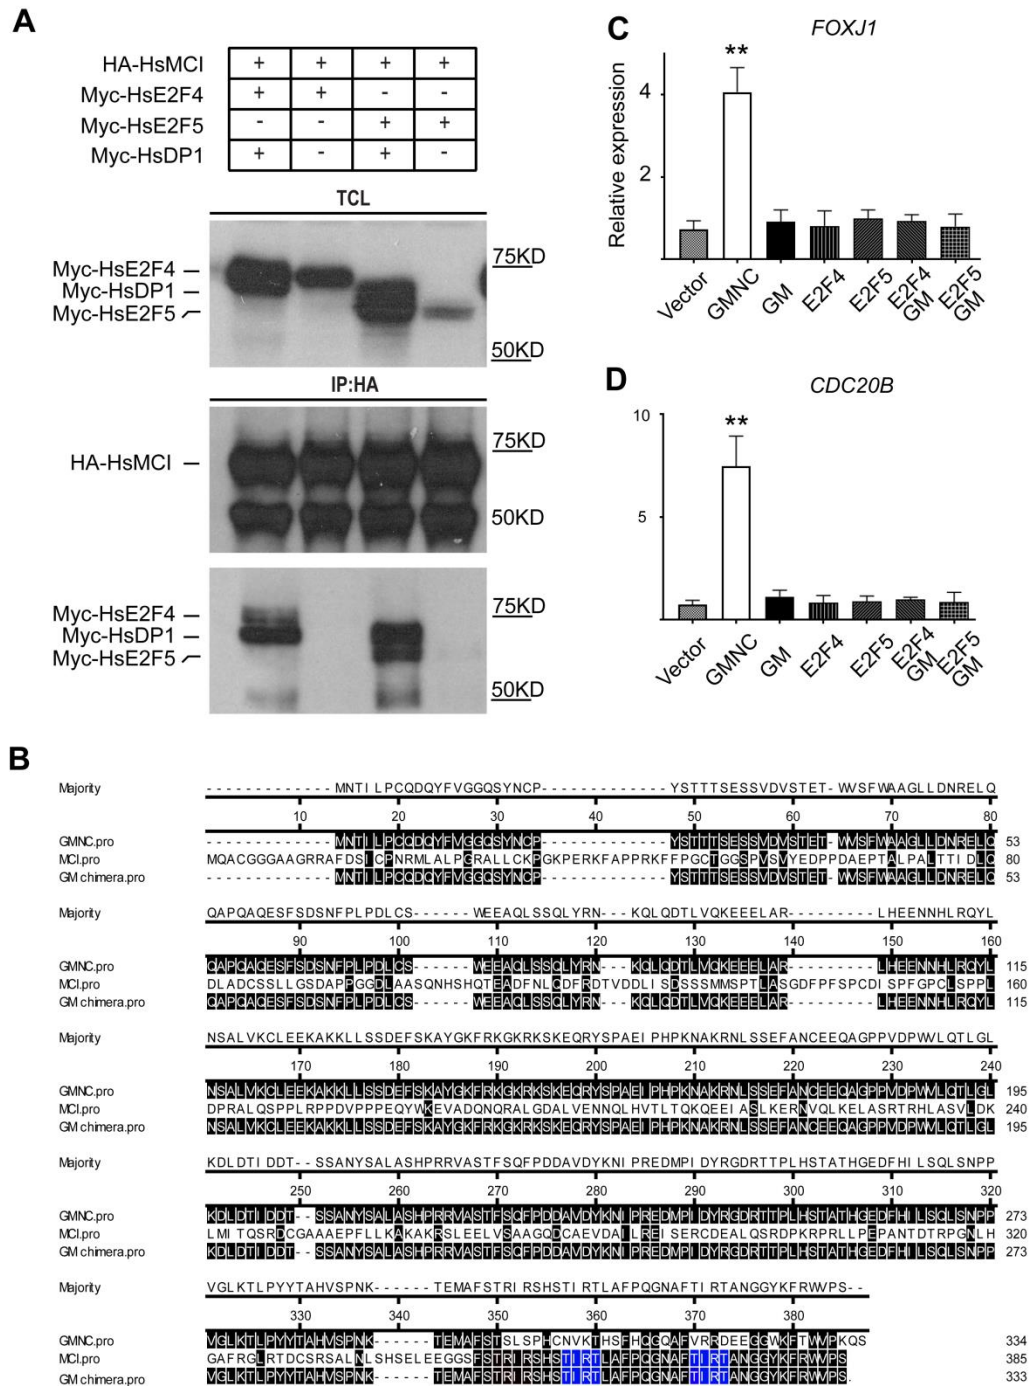

**Fig. S4. Interaction of MCI with E2F factors and transcriptional activity of the GMNC-MCI chimeric protein in HEK293T cells. (A) Co-immunoprecipitation data**

showing interaction of MCI with E2F4 as well as E2F5. Human proteins were used for this experiment. (B) Amino acid sequence alignment of human GMNC, MCI and GM proteins. The C-terminal TIRT domain from MCI used to generate GM is underlined in red, and the TIRT residues in MCI and GM proteins are highlighted in blue. (C) Unlike wild-type GMNC, the GM chimeric protein is unable to induce *FOXJ1* expression by itself or together with the E2F factors. (D) The GM protein is not more efficient in inducing *CDC20B* expression than wild-type GMNC either by itself or with the E2F factors. For C and D, relative expression levels have been plotted along the *y*-axis, and overexpression conditions indicated along the *x*-axis. Error bars: SEM. Immunoblot and qPCR data are representative of 2 independent biological replicates.  $p: ** \leq 0.01$ .

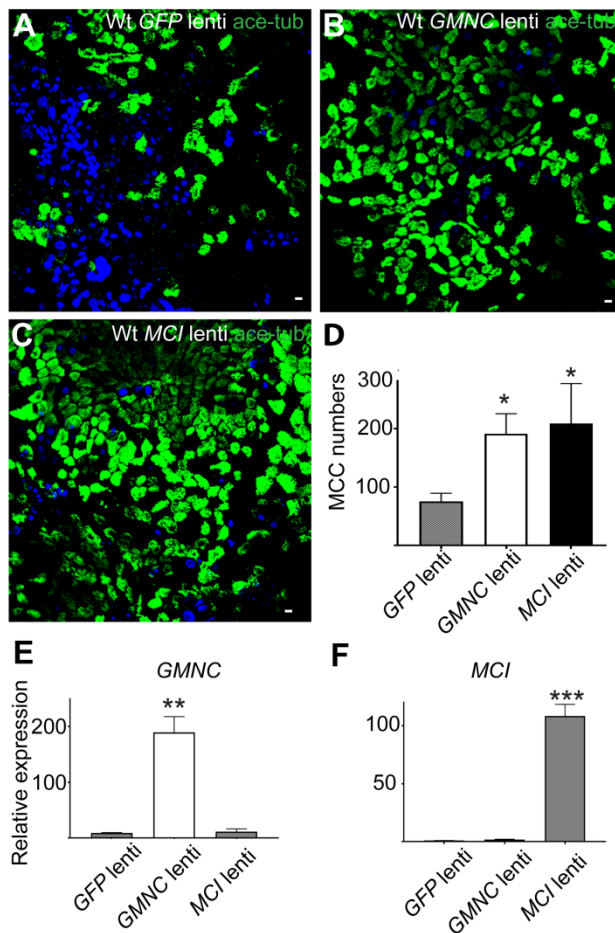

**Fig. S5. Overexpression of GMNC and MCI in wild-type airway cell ALI culture induces supernumerary MCCs.** (A) Lentivirus mediated overexpression of GFP in wild-type airway cell ALI culture does not affect numbers of differentiating MCCs. (B) Overexpression of GMNC in wild-type airway cell ALI culture induces supernumerary MCCs. (C) Overexpression of MCI in wild-type airway cell ALI culture induces supernumerary MCCs. Scale bars, 5  $\mu$ m. (D) Quantification of MCC numbers per field of view upon overexpression of GFP, GMNC and MCI in wild-type airway cell ALI

cultures. (E,F) RT-qPCR analysis of GMNC and MCI expression levels on overexpression of GMNC and MCI in *Mci* mutant airway cells cultured under ALI conditions. Relative expression levels have been plotted along the *y*-axis, and overexpression conditions indicated along the *x*-axis. Lentivirus-mediated overexpression of GFP, MCI and GMNC in ALI cultures represent 2 independent biological replicates; qPCR analysis represents 2 independent technical replicates. Error bars: SEM. p: \*  $\leq 0.05$ , \*\*  $\leq 0.01$ , \*\*\*  $\leq 0.001$ .

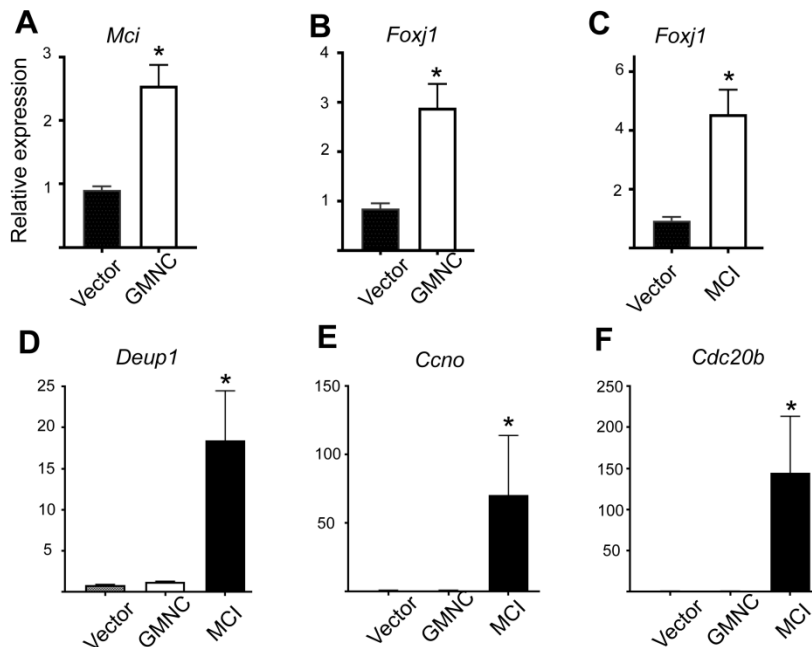

**Fig. S6. RT-qPCR analysis of ciliary transcription factor and DD pathway genes expression levels on overexpression of MCI and GMNC in *Mci* mutant airway cells**

**cultured under ALI conditions.** (A-F) Relative expression levels have been plotted along the  $y$ -axis, and overexpression conditions indicated along the  $x$ -axis. Error bars represent SEM. Analysis was done on 3 independent biological replicates.  $p: * \leq 0.05$ .

**Table S1. Primer sequences**

| Name of gRNA/primer | Sequence (5'-3')                                                                                                | Remarks                                                   |
|---------------------|-----------------------------------------------------------------------------------------------------------------|-----------------------------------------------------------|
| gRNA-Mcidas1        | CAGCCCGGTGGCGGTGTACGGTTTTAGAGCTA<br>GAAATAGCAAGTTAAAATAAGGCTAGTCCGTT<br>ATCAACTTGAAAAAGTGGCACCGAGTCGGTGC<br>TTT | gRNA<br>sequences                                         |
| gRNA-Mcidas2        | GGGTCCTCGTACACCGCCACGTTTTAGAGCTA<br>GAAATAGCAAGTTAAAATAAGGCTAGTCCGTT<br>ATCAACTTGAAAAAGTGGCACCGAGTCGGTGC<br>TTT |                                                           |
| McidasGT1(forward)  | TGGTCCTGGCTCTGGGAGAGTCTGCC                                                                                      | Primers for<br>genotyping of<br><i>Mci</i> mutant<br>mice |
| McidasGT2(reverse)  | ACCAGGACCCTCAGTGAGGACCTCGG                                                                                      |                                                           |
| Mci-L               | CGGAGCAGTACTGGAAGGAG                                                                                            | qPCR primers<br>for mouse<br>genes                        |
| Mci-R               | TTCGTTGTTGCCTTGATCTG                                                                                            |                                                           |
| Gmnc-L              | TCTGGAAGAGAAGGCCAAGA                                                                                            |                                                           |
| Gmnc-R              | CCCAGGTTGTTCTCTCACAGT                                                                                           |                                                           |
| Foxj1-L             | GAGCTGGAACCACTCAAAGG                                                                                            |                                                           |
| Foxj1-R             | GGTAGCAGGGCAGTTGATGT                                                                                            |                                                           |
| Rfx2-L              | TGTGAGCCGATCCTACAGTG                                                                                            |                                                           |
| Rfx2-R              | ACCTTGGTCTGGATGACCTG                                                                                            |                                                           |
| Rfx3-L              | CAGACAGTTCAGCAGGTCCA                                                                                            |                                                           |
| Rfx3-R              | CTGGGCAGAACTTCCTTGAG                                                                                            |                                                           |
| Deup1-L             | AGATGCGGGCTTTAGAGACA                                                                                            |                                                           |
| Deup1-R             | CGGTGAATTTGGTTTTGCTT                                                                                            |                                                           |
| Ccno-L              | GCTGAGCCTAACGGATTACG                                                                                            |                                                           |
| Ccno-R              | TGATGGACACTAGCGTCTGC                                                                                            |                                                           |

|                       |                                                      |                                                                                    |
|-----------------------|------------------------------------------------------|------------------------------------------------------------------------------------|
| Cdc20b-L              | GAAGGAAAATCTTGCCACCA                                 |                                                                                    |
| Ccdc20b-R             | TTGGCATGTGGAATGGTAGA                                 |                                                                                    |
| Ccdc78-L              | ACCAGGTGCCACCATTAGAG                                 |                                                                                    |
| Ccdc78-R              | AAGCCAGTTGCTGACCAGTT                                 |                                                                                    |
| Gapdh-L               | AACTTTGGCATTGTGGAAGG                                 |                                                                                    |
| Gapdh-R               | ACACATTGGGGGTAGGAACA                                 |                                                                                    |
| Cep63-L               | TCTGTGAGTGCAACATGCAA                                 |                                                                                    |
| Cep63-R               | GAGGAACACTTGGCAGAAGC                                 |                                                                                    |
| Plk4-L                | AAACCAAAAAGGCTGTGGTG                                 |                                                                                    |
| Plk4-R                | GGAGGTCTGTCAGCAAGAGG                                 |                                                                                    |
| Cep152-L              | GCTGTGGACACTGCTTTCAA                                 |                                                                                    |
| Cep152-R              | CACCCTGCTGTTCTCCTCTC                                 |                                                                                    |
| Sas6-L                | CCTGCAGCTTACAAACCAGG                                 |                                                                                    |
| Sas6-R                | CTGGCTAATCCGCGTAAAG                                  |                                                                                    |
| MCI-L                 | GCCTGAGCAATACTGGAAGG                                 | qPCR primers<br>for human<br>genes                                                 |
| MCI-R                 | AGTTCCTTCAGCTGCACGTT                                 |                                                                                    |
| GMNC-L                | CCCAAAAATGCCAAAAGAAA                                 |                                                                                    |
| GMNC-R                | AATGTGCTGGCGACTCTTCT                                 |                                                                                    |
| FOXJ1-L               | CACGTGAAGCCTCCCTACTC                                 |                                                                                    |
| FOXJ1-R               | GGATTGAATTCTGCCAGGTG                                 |                                                                                    |
| DEUP1-L               | CACAAAGAAAGCTGCCCTTC                                 |                                                                                    |
| DEUP1-R               | TCGGAGCCTTTCATTCTCAT                                 |                                                                                    |
| CCNO-L                | TCTACAGACCTTCCGCGACT                                 |                                                                                    |
| CCNO-R                | TCCAGAGTGTTACCGTCAG                                  |                                                                                    |
| CDC20B-L              | GAAGACACCGCCTGAGAAAG                                 |                                                                                    |
| CDC20B-R              | CACAGAGCTGCATTTTCCA                                  |                                                                                    |
| GAPDH-L               | GAGTCAACGGATTTGGTCGT                                 |                                                                                    |
| GAPDH-R               | TTGATTTTGGAGGGATCTCG                                 |                                                                                    |
| GM-N-N                | AGTCAGTCAAGCTTATGAAC<br>ACCATTCTGCCT                 | Primers to<br>generate<br>GMNC N-<br>terminus and<br>MCI C-<br>terminus<br>chimera |
| GM-C-N                | GGATGCGGGTGCTGAATGCCAT<br>CTCTGTCTTG                 |                                                                                    |
| GM-N-C                | CAAGACAGAGATGGCATTGAGC<br>ACCCGCATCC                 |                                                                                    |
| GM-C-C                | AGTCAGTCGCGGCCGCACTGGGGA<br>CCCAGCGGAAC              |                                                                                    |
| GMNC-HA-<br>XhoI-pLvX | GATCGATCCTCGAGGCCACCATGT<br>ACCCATACGACGTGCCAGACTACG | Primers to<br>clone HA-                                                            |

|                      |                                                                             |                                                              |
|----------------------|-----------------------------------------------------------------------------|--------------------------------------------------------------|
|                      | CAATGAACACCATCTGCC                                                          | tagged GMNC<br>into PLVX<br>vector                           |
| GMNC-C-XbaI-<br>pLvX | GATCGATCTCTAGACTAAGACTGC<br>TTAGGGAC                                        |                                                              |
| MCI-HA-XhoI-<br>pLvX | GATCGATCCTCGAGGCCACCATGT<br>ACCCATACGACGTGCCAGACTACG<br>CAATGCAGGCGTGCGGGGG | Primers to<br>clone HA-<br>tagged MCI<br>into PLVX<br>vector |
| MCI-C-XbaI-<br>pLvX  | GATCGATCTCTAGATCAACTGGG<br>GACCCAGCG                                        |                                                              |
